# Supplementary material for: Pioneer neutrophils release chromatin within in vivo swarms
Source: eLife. 2021 Jul 21;10:e68755. doi: 10.7554/eLife.68755 (PMC8298094; doi:10.7554/eLife.68755)
Supplement: Figure 1—figure supplement 1—source data 1. [file elife-68755-fig1-figsupp1-data1.csv]

PBS	SH1000
0	16
0	7
1	2
0	18
2	21
2	19
1	32
0	23
1
0
0	18
2	31
1	13
1	25
0	10
1	30
1
1
1
4	8
0	17
2	38
1	48
1	28
0	30
0	23
1	7
0	31
2	12
8	22
2
