# Supplementary material for: Pioneer neutrophils release chromatin within in vivo swarms
Source: eLife. 2021 Jul 21;10:e68755. doi: 10.7554/eLife.68755 (PMC8298094; doi:10.7554/eLife.68755)
Supplement: Figure 1—figure supplement 3—source data 2. [file elife-68755-fig1-figsupp3-data2.csv]

1.516667
1.716667
2.041667
1.366667
4.041667
1.875000
4.183333
1.366667
2.916667
1.050000
1.825000
