# Supplementary material for: Pioneer neutrophils release chromatin within in vivo swarms
Source: eLife. 2021 Jul 21;10:e68755. doi: 10.7554/eLife.68755 (PMC8298094; doi:10.7554/eLife.68755)
Supplement: Figure 1—source data 1. [file elife-68755-fig1-data1.csv]

No Swarm	Transient swarm	Persistent swarm
36.0	14.0	50.0
