# Supplementary material for: Pioneer neutrophils release chromatin within in vivo swarms
Source: eLife. 2021 Jul 21;10:e68755. doi: 10.7554/eLife.68755 (PMC8298094; doi:10.7554/eLife.68755)
Supplement: Figure 2—source data 1. [file elife-68755-fig2-data1.csv]

Time (mins post injury)
45.50000	119.66070
46.00000	119.63580
46.50000	119.82260
47.00000	118.41250
47.50000	111.03290
48.00000	114.06060
48.50000	115.13110
49.00000	115.46990
49.50000	115.00590
50.00000	114.44680
50.50000	116.54180
51.00000	117.15700
51.50000	125.21970
52.00000	125.98180
52.50000	127.06170
53.00000	128.84530
53.50000	131.96120
54.00000	132.09880
54.50000	132.11040
55.00000	131.96520
55.50000	129.71150
56.00000	122.21530
56.50000	115.72280
57.00000	112.24350
57.50000	110.99760
58.00000	108.90880
58.50000	109.23910
59.00000	107.61120
59.50000	107.70790
60.00000	108.51750
60.50000	106.83370
61.00000	107.17810
61.50000	107.63010
62.00000	106.96840
62.50000	106.22210
63.00000	105.79360
63.50000	105.24190
64.00000	104.58080
64.50000	105.21280
65.00000	105.00980
65.50000	105.71350
66.00000	106.88470
66.50000	111.12650
67.00000	115.91460
67.50000	114.81250
68.00000	114.36910
68.50000	113.29330
69.00000	110.94760
69.50000	105.80250
70.00000	105.18060
70.50000	105.42650
71.00000	102.86380
71.50000	100.66460
72.00000	97.79894
72.50000	92.55834
73.00000	90.57968
73.50000	90.53270
74.00000	90.36832
74.50000	87.48082
75.00000	85.74340
75.50000	84.78675
76.00000	83.52046
76.50000	82.70067
77.00000	84.15422
77.50000	84.21193
78.00000	84.70129
78.50000	85.91200
79.00000	85.99403
79.50000	85.15202
80.00000	84.97105
80.50000	83.92106
81.00000	83.70212
81.50000	84.67170
82.00000	84.85651
82.50000	84.65838
83.00000	83.81812
83.50000	84.27306
84.00000	82.10407
84.50000	81.34380
85.00000	83.97507
85.50000	84.38889
86.00000	84.54079
86.50000	84.38015
87.00000	83.85783
87.50000	84.64630
88.00000	84.79665
88.50000	84.84276
89.00000	84.78981
89.50000	85.43883
90.00000	84.42549
90.50000	84.04404
91.00000	74.14642
91.50000	73.47275
92.00000	72.34983
92.50000	72.56553
93.00000	72.39118
93.50000	72.41336
94.00000	72.40719
94.50000	72.15348
95.00000	71.27269
95.50000	71.55224
96.00000	71.53226
96.50000	71.19818
97.00000	70.46068
97.50000	68.61382
98.00000	67.90789
98.50000	68.22255
99.00000	68.39959
99.50000	68.34423
100.00000	68.11429
100.50000	68.25453
101.00000	69.03762
101.50000	68.95034
102.00000	68.60497
102.50000	68.63483
103.00000	68.29031
103.50000	68.25873
104.00000	68.64929
104.50000	68.62980
105.00000	68.43624
105.50000	67.54877
106.00000	66.85669
106.50000	67.92764
107.00000	68.49329
107.50000	68.33930
108.00000	68.37370
108.50000	68.70992
109.00000	68.07605
109.50000	67.76369
110.00000	68.63833
110.50000	69.67168
111.00000	69.88746
111.50000	70.03887
112.00000	70.64609
112.50000	70.95211
113.00000	70.80773
113.50000	70.83299
114.00000	71.33626
114.50000	71.35806
115.00000	71.45187
50.00000		487.88200
50.50000		485.40840
51.00000		478.44500
51.50000		471.18840
52.00000		462.43690
52.50000		455.87900
53.00000		448.61460
53.50000		441.48540
54.00000		431.32170
54.50000		422.13690
55.00000		417.55400
55.50000		409.68700
56.00000		409.99850
56.50000		409.54650
57.00000		396.43540
57.50000		388.51910
58.00000		375.95230
58.50000		370.39800
59.00000		366.91970
59.50000		361.28510
60.00000		352.58600
60.50000		344.54200
61.00000		332.38200
61.50000		326.66910
62.00000		325.15140
62.50000		322.76360
63.00000		325.71730
63.50000		316.90450
64.00000		306.70940
64.50000		301.82120
65.00000		294.08050
65.50000		293.27450
66.00000		291.73910
66.50000		283.52080
67.00000		280.29440
67.50000		281.64710
68.00000		280.04100
68.50000		284.10770
69.00000		286.60470
69.50000		279.25470
70.00000		273.00090
70.50000		271.23530
71.00000		259.43180
71.50000		252.76090
72.00000		248.71110
72.50000		242.23850
73.00000		227.57410
73.50000		225.48650
74.00000		218.68530
74.50000		211.40840
75.00000		211.69720
75.50000		206.28350
76.00000		200.02340
76.50000		193.61890
77.00000		193.48670
77.50000		191.21220
78.00000		184.74060
78.50000		173.31020
79.00000		168.60590
79.50000		166.12710
80.00000		157.98270
80.50000		147.07080
81.00000		146.57910
81.50000		145.49820
82.00000		145.94600
82.50000		136.42950
83.00000		128.17070
83.50000		117.26920
84.00000		110.75740
84.50000		101.86390
85.00000		94.79064
85.50000		90.89197
86.00000		80.52112
86.50000		75.58809
87.00000		71.68655
87.50000		60.12016
88.00000		52.21948
88.50000		42.15413
89.00000		33.21027
89.50000		22.28076
59.50000			216.24200
60.00000			215.92840
60.50000			212.33600
61.00000			201.11920
61.50000			200.90480
62.00000			200.21230
62.50000			198.01730
63.00000			192.14020
63.50000			177.85580
64.00000			168.89050
64.50000			162.10460
65.00000			150.43930
65.50000			148.00710
66.00000			146.68420
66.50000			142.42070
67.00000			138.82890
67.50000			134.56890
68.00000			127.29450
68.50000			120.07900
69.00000			115.39740
69.50000			105.07130
70.00000			100.81120
70.50000			95.95225
71.00000			91.77639
71.50000			86.62901
72.00000			84.64897
72.50000			80.86746
73.00000			76.21803
73.50000			73.32660
74.00000			69.51225
74.50000			63.63038
75.00000			58.17010
75.50000			54.16241
76.00000			53.51898
76.50000			55.59475
77.00000			55.10067
77.50000			54.61526
78.00000			53.62756
78.50000			51.59481
79.00000			51.69403
79.50000			51.71747
80.00000			48.74877
80.50000			45.96449
81.00000			43.40227
81.50000			39.46256
82.00000			39.33648
82.50000			39.54718
83.00000			40.03342
83.50000			40.16547
84.00000			39.90169
84.50000			40.40968
85.00000			40.63573
85.50000			41.20012
86.00000			42.39296
86.50000			40.34257
87.00000			40.25419
68.50000				152.07830
69.00000				152.50210
69.50000				153.41750
70.00000				154.47370
70.50000				156.26940
71.00000				156.35250
71.50000				153.10420
72.00000				152.48250
72.50000				152.52820
73.00000				146.32130
73.50000				142.33420
74.00000				141.54020
74.50000				140.04910
75.00000				133.77490
75.50000				125.99370
76.00000				124.33890
76.50000				116.95640
77.00000				114.02330
77.50000				105.68520
78.00000				100.73060
78.50000				99.36434
79.00000				93.26698
79.50000				92.81287
80.00000				92.81804
80.50000				92.84693
81.00000				92.85599
81.50000				93.22068
82.00000				93.58615
82.50000				93.67895
83.00000				92.51071
83.50000				92.28264
84.00000				91.76048
84.50000				93.03464
85.00000				94.71953
85.50000				95.43847
86.00000				94.88821
86.50000				95.39579
87.00000				96.36316
87.50000				97.68372
88.00000				98.29605
88.50000				97.40184
89.00000				95.87815
89.50000				95.37993
90.00000				94.53660
90.50000				94.44066
91.00000				97.22919
91.50000				103.63770
92.00000				102.95980
92.50000				101.97560
93.00000				101.53820
93.50000				88.12816
94.00000				86.73726
94.50000				86.08713
95.00000				84.67586
95.50000				83.84448
96.00000				82.69759
96.50000				82.23337
97.00000				82.21520
97.50000				81.89149
98.00000				81.70502
98.50000				80.82009
99.00000				81.04870
99.50000				81.04509
100.00000				80.93394
100.50000				80.39260
101.00000				80.92442
101.50000				81.24835
102.00000				81.64547
102.50000				82.16289
103.00000				79.43506
103.50000				81.95811
104.00000				80.86948
104.50000				82.60257
105.00000				83.13392
105.50000				84.22834
106.00000				84.25274
106.50000				84.28334
107.00000				84.72901
107.50000				85.04332
108.00000				84.53237
92.50000						145.68180
93.00000						142.04590
93.50000						138.65940
94.00000						137.42250
94.50000						136.22970
95.00000						133.00140
95.50000						126.13610
96.00000						123.75570
96.50000						118.75300
97.00000						119.17450
97.50000						120.12710
98.00000						118.71800
98.50000						112.57060
99.00000						104.79290
99.50000						102.49440
100.00000						95.01522
100.50000						90.12924
101.00000						89.04125
101.50000						87.11653
102.00000						86.70230
102.50000						86.21624
103.00000						85.85586
103.50000						84.51627
104.00000						83.93667
104.50000						80.51104
105.00000						76.62985
105.50000						74.92206
106.00000						73.84333
106.50000						73.05590
107.00000						69.64322
107.50000						67.41380
108.00000						63.65119
108.50000						62.95838
109.00000						63.28307
109.50000						63.36766
64.50000							158.9188
65.00000							155.1663
65.50000							151.9778
66.00000							150.4187
66.50000							152.3960
67.00000							155.1217
67.50000							160.4754
68.00000							166.9663
68.50000							167.0504
69.00000							169.5049
69.50000							171.1107
70.00000							166.5713
70.50000							164.0726
71.00000							159.9611
71.50000							157.3577
72.00000							154.1127
72.50000							156.0649
73.00000							160.4403
73.50000							166.6398
74.00000							166.2635
74.50000							172.0938
75.00000							179.8248
75.50000							190.6767
76.00000							193.2672
76.50000							191.8209
77.00000							184.6990
77.50000							177.9182
78.00000							170.8520
78.50000							163.1047
79.00000							161.6987
69.00000								155.41920
69.50000								153.45410
70.00000								150.05020
70.50000								146.12940
71.00000								142.63550
71.50000								138.91130
72.00000								135.90110
72.50000								132.38600
73.00000								133.47870
73.50000								130.02170
74.00000								123.29650
74.50000								117.35350
75.00000								115.54930
75.50000								113.77000
76.00000								107.96670
76.50000								107.65550
77.00000								107.92300
77.50000								108.24130
78.00000								104.39580
78.50000								99.71541
79.00000								93.20478
79.50000								91.51648
80.00000								90.01392
74.00000									175.3159
74.50000									172.9624
75.00000									170.9183
75.50000									169.3710
76.00000									168.1347
76.50000									164.3492
77.00000									161.1960
77.50000									158.0583
78.00000									152.3608
78.50000									148.9287
79.00000									149.5201
79.50000									145.6913
80.00000									135.6169
80.50000									137.8539
81.00000									143.6794
81.50000									150.1414
82.00000									154.2230
82.50000									162.0648
83.00000									167.5948
83.50000									168.4630
84.00000									169.7635
84.50000									170.1848
85.00000									170.7320
85.50000									171.7140
86.00000									174.8670
86.50000									179.5398
87.00000									182.1452
87.50000									188.7572
88.00000									185.4328
88.50000									183.3109
89.00000									187.3164
89.50000									185.9438
90.00000									188.2647
90.50000									191.9354
91.00000									191.8639
91.50000									191.7323
92.00000									193.5327
92.50000									195.6462
93.00000									193.2260
93.50000									187.7759
94.00000									184.7450
94.50000									175.6608
95.00000									170.5100
95.50000									168.6182
96.00000									168.5573
96.50000									169.2139
97.00000									172.4679
97.50000									176.6523
98.00000									177.7287
98.50000									180.8340
99.00000									182.6280
99.50000									184.6746
100.00000									185.7318
100.50000									187.6349
101.00000									189.7055
101.50000									189.6141
102.00000									191.4563
102.50000									192.6089
103.00000									192.6497
103.50000									185.6266
104.00000									179.7307
104.50000									179.2193
105.00000									181.0754
105.50000									181.2959
106.00000									181.8035
106.50000									182.1406
107.00000									182.6817
107.50000									183.8667
108.00000									183.5549
108.50000									181.2764
109.00000									180.9251
109.50000									179.0709
110.00000									177.3754
110.50000									179.8471
111.00000									181.0117
111.50000									179.3721
112.00000									178.6705
112.50000									178.5261
113.00000									177.4098
113.50000									175.8252
114.00000									177.2958
114.50000									176.1629
115.00000									174.5277
85.50000										213.6046
86.00000										213.0824
86.50000										210.5051
87.00000										208.5425
87.50000										204.8611
88.00000										204.2795
88.50000										201.9234
89.00000										197.9999
89.50000										192.1354
90.00000										190.3314
90.50000										188.0222
91.00000										184.5942
91.50000										180.4230
92.00000										175.3692
92.50000										164.8691
93.00000										157.2007
93.50000										154.9212
94.00000										151.2403
94.50000										147.8095
95.00000										144.6163
95.50000										143.3680
96.00000										142.9413
96.50000										143.7157
97.00000										142.2655
97.50000										140.5141
98.00000										139.7564
98.50000										140.1405
99.00000										145.3847
99.50000										146.2990
100.00000										146.0746
100.50000										148.1197
101.00000										142.7030
101.50000										138.7551
102.00000										134.4432
102.50000										132.6877
103.00000										121.8868
103.50000										112.5757
104.00000										110.0735
104.50000										109.9234
97.00000											147.6838
97.50000											147.6989
98.00000											147.7141
98.50000											147.2731
99.00000											146.9909
99.50000											146.7108
100.00000											146.6145
100.50000											146.6329
101.00000											146.6202
101.50000											145.6184
102.00000											145.8651
102.50000											145.7920
103.00000											146.0844
103.50000											146.1557
104.00000											146.0794
104.50000											145.9025
105.00000											145.8700
105.50000											145.8377
106.00000											145.5754
106.50000											145.0007
107.00000											144.8062
107.50000											144.3458
108.00000											144.4522
108.50000											144.4815
109.00000											145.1757
109.50000											145.0584
97.00000												161.0814
97.50000												162.1179
98.00000												163.1573
98.50000												163.0186
99.00000												163.2575
99.50000												164.4508
100.00000												161.8111
100.50000												161.6751
101.00000												160.4756
101.50000												157.6198
102.00000												155.3802
102.50000												155.0891
103.00000												156.7582
103.50000												158.0558
104.00000												160.2454
104.50000												162.9835
105.00000												163.2184
105.50000												162.1373
106.00000												162.8361
106.50000												163.3354
107.00000												164.1283
107.50000												164.1940
108.00000												161.7580
108.50000												159.7540
109.00000												159.6414
109.50000												154.3297
30.50000													417.47650
31.00000													416.61520
31.50000													414.04120
32.00000													414.78370
32.50000													412.75300
33.00000													413.24960
33.50000													411.05480
34.00000													407.48380
34.50000													406.40120
35.00000													405.93800
35.50000													406.15890
36.00000													404.87140
36.50000													401.98040
37.00000													398.85700
37.50000													397.00340
38.00000													393.39680
38.50000													387.84470
39.00000													381.69470
39.50000													380.97350
40.00000													379.97210
40.50000													379.81290
41.00000													378.83060
41.50000													375.98570
42.00000													375.44660
42.50000													373.62730
43.00000													371.43730
43.50000													369.78510
44.00000													364.35830
44.50000													365.63160
45.00000													364.62760
45.50000													363.92710
46.00000													350.99080
46.50000													340.11200
47.00000													330.69020
47.50000													322.40620
48.00000													320.60860
48.50000													319.12800
49.00000													314.93480
49.50000													312.99000
50.00000													310.69930
50.50000													305.28370
51.00000													300.65550
51.50000													298.01170
52.00000													296.56510
52.50000													294.66210
53.00000													291.82240
53.50000													285.44970
54.00000													284.32640
54.50000													281.14120
55.00000													273.28350
55.50000													273.21840
56.00000													272.69620
56.50000													265.18530
57.00000													261.94080
57.50000													256.55710
58.00000													250.64440
58.50000													247.54530
59.00000													242.70410
59.50000													239.38690
60.00000													232.07480
60.50000													232.16530
61.00000													230.16550
61.50000													230.76000
62.00000													229.17720
62.50000													225.84010
63.00000													222.98520
63.50000													218.74370
64.00000													213.69760
64.50000													207.87760
65.00000													206.68220
65.50000													203.14270
66.00000													200.15760
66.50000													194.99420
67.00000													189.60690
67.50000													184.23120
68.00000													175.52990
68.50000													174.58690
69.00000													173.10820
69.50000													169.39020
70.00000													167.70610
70.50000													162.98590
71.00000													158.83250
71.50000													157.66990
72.00000													150.08750
72.50000													146.28740
73.00000													146.51710
73.50000													146.46230
74.00000													146.11350
74.50000													146.14780
75.00000													145.45910
75.50000													142.01390
76.00000													139.41170
76.50000													135.36790
77.00000													131.47820
77.50000													126.81500
78.00000													122.01440
78.50000													117.12460
79.00000													112.45470
79.50000													106.61530
80.00000													99.98632
80.50000													94.63646
81.00000													88.68840
81.50000													89.23885
82.00000													89.90265
82.50000													93.80134
83.00000													95.66247
83.50000													97.56842
84.00000													100.29170
84.50000													100.69370
85.00000													101.43670
85.50000													99.04337
86.00000													93.95093
86.50000													89.60104
87.00000													83.04237
87.50000													79.88279
88.00000													75.06059
88.50000													68.22872
89.00000													58.82031
89.50000													50.40588
90.00000													47.97808
90.50000													49.82208
91.00000													41.82297
91.50000													36.51418
92.00000													33.52106
92.50000													35.08923
93.00000													32.57841
93.50000													21.40511
94.00000													18.17560
94.50000													16.96027
95.00000													14.12008
30.50000														500.4879
31.00000														498.4822
31.50000														497.1440
32.00000														493.4247
32.50000														490.2990
33.00000														485.0539
33.50000														483.6853
34.00000														484.0787
34.50000														484.0242
35.00000														483.1421
35.50000														477.9834
36.00000														476.3816
36.50000														476.2136
37.00000														474.3074
37.50000														467.2425
38.00000														466.7373
38.50000														466.6240
39.00000														463.3002
39.50000														456.2865
40.00000														451.6045
40.50000														449.9353
41.00000														448.0284
41.50000														445.7838
42.00000														444.5029
42.50000														444.6835
43.00000														443.8311
43.50000														439.1592
44.00000														436.5289
44.50000														434.7479
45.00000														432.5591
45.50000														427.4394
46.00000														422.9795
46.50000														419.3786
47.00000														417.8602
47.50000														415.8247
48.00000														411.2707
48.50000														407.4923
49.00000														405.7693
49.50000														402.3572
50.00000														396.9292
50.50000														393.6787
51.00000														394.3936
51.50000														394.6484
52.00000														393.4873
52.50000														385.3657
53.00000														383.4662
53.50000														378.8552
54.00000														375.9381
54.50000														372.9546
55.00000														373.1564
55.50000														371.3398
56.00000														368.0887
56.50000														365.4908
57.00000														362.6764
57.50000														357.8966
58.00000														356.5621
58.50000														355.3499
59.00000														352.9989
59.50000														350.5325
60.00000														344.3311
60.50000														339.6934
61.00000														339.2950
61.50000														338.7342
62.00000														337.8808
62.50000														335.8503
63.00000														331.4753
63.50000														328.6260
64.00000														327.8402
64.50000														324.0826
65.00000														318.3711
65.50000														315.3240
66.00000														312.9485
66.50000														311.4696
67.00000														304.9167
67.50000														299.9754
68.00000														297.9202
68.50000														293.3038
69.00000														290.5638
69.50000														287.7128
70.00000														275.4380
70.50000														271.0194
71.00000														265.6738
71.50000														258.4844
72.00000														256.6244
72.50000														254.4885
73.00000														248.2977
73.50000														246.2542
74.00000														240.4668
74.50000														234.6353
75.00000														230.2895
75.50000														228.0238
76.00000														225.7433
76.50000														224.0214
77.00000														223.7940
77.50000														222.5544
78.00000														214.7810
78.50000														209.8945
79.00000														207.7730
79.50000														202.2334
80.00000														200.8375
80.50000														195.9936
81.00000														192.8159
81.50000														192.2190
82.00000														189.6045
82.50000														184.8051
83.00000														175.9363
83.50000														165.9968
84.00000														159.2512
84.50000														155.4089
85.00000														155.9044
50.00000															258.798000
50.50000															255.372100
51.00000															251.118400
51.50000															247.673500
52.00000															247.970700
52.50000															247.388100
53.00000															246.999600
53.50000															246.547700
54.00000															247.121800
54.50000															245.999700
55.00000															231.821500
55.50000															232.663900
56.00000															230.475400
56.50000															228.637300
57.00000															228.745600
57.50000															227.716300
58.00000															224.532600
58.50000															224.418800
59.00000															221.809000
59.50000															213.647600
60.00000															205.551600
60.50000															201.382700
61.00000															199.492000
61.50000															197.321000
62.00000															196.129900
62.50000															191.287300
63.00000															188.192000
63.50000															187.212500
64.00000															186.378000
64.50000															182.876700
65.00000															175.763700
65.50000															174.072300
66.00000															167.392800
66.50000															163.069800
67.00000															156.611500
67.50000															151.718800
68.00000															149.080000
68.50000															145.861100
69.00000															141.149300
69.50000															136.003100
70.00000															129.612400
70.50000															125.984300
71.00000															118.177400
71.50000															109.866200
72.00000															106.191000
72.50000															100.744400
73.00000															97.448700
73.50000															93.679270
74.00000															87.723600
74.50000															83.864810
75.00000															75.913310
75.50000															70.584990
76.00000															67.407840
76.50000															58.447240
77.00000															51.888350
77.50000															42.330960
78.00000															34.746470
78.50000															28.381710
79.00000															24.288140
79.50000															17.453920
80.00000															13.778330
80.50000															11.400790
81.00000															5.818843
81.50000															5.004459
82.00000															5.687824
82.50000															5.987170
83.00000															6.360133
83.50000															6.774167
84.00000															4.973305
84.50000															5.379995
85.00000															6.245206
85.50000															6.191317
86.00000															6.206057
86.50000															5.830458
87.00000															6.168593
87.50000															6.331302
88.00000															6.209900
88.50000															6.194589
89.00000															6.263829
89.50000															6.214009
90.00000															6.664854
90.50000															6.830688
91.00000															7.241598
91.50000															6.835078
92.00000															6.992488
92.50000															7.143170
93.00000															7.450462
93.50000															7.569446
94.00000															8.408811
94.50000															8.521498
95.00000															7.736242
95.50000															8.220590
96.00000															8.364507
96.50000															9.243104
97.00000															9.449538
97.50000															10.763780
98.00000															10.586320
98.50000															8.839670
99.00000															10.333420
99.50000															9.464092
100.00000															8.776013
100.50000															9.023170
101.00000															7.919052
101.50000															8.720070
50.00000																240.76970
50.50000																238.99300
51.00000																240.56850
51.50000																239.33300
52.00000																239.15340
52.50000																242.93780
53.00000																244.10920
53.50000																245.07630
54.00000																244.01920
54.50000																239.93540
55.00000																235.72400
55.50000																233.90700
56.00000																237.28400
56.50000																239.02600
57.00000																239.40630
57.50000																238.64240
58.00000																238.02580
58.50000																235.97730
59.00000																234.26270
59.50000																233.19310
60.00000																231.81240
60.50000																229.54380
61.00000																227.15020
61.50000																227.14160
62.00000																229.30910
62.50000																230.73690
63.00000																229.49690
63.50000																228.63620
64.00000																218.34860
64.50000																208.11160
65.00000																206.15450
65.50000																204.20270
66.00000																204.18030
66.50000																203.53570
67.00000																198.60780
67.50000																193.70550
68.00000																188.70400
68.50000																191.98180
69.00000																192.02760
69.50000																191.60510
70.00000																190.64770
70.50000																188.14150
71.00000																185.63180
71.50000																184.07050
72.00000																183.61520
72.50000																183.39950
73.00000																182.29560
73.50000																182.62170
74.00000																182.89460
74.50000																182.46220
75.00000																182.67430
75.50000																182.76280
76.00000																182.79750
76.50000																180.08170
77.00000																175.92750
77.50000																169.79760
78.00000																167.92350
78.50000																167.08080
79.00000																161.51720
79.50000																152.06030
80.00000																146.83410
80.50000																142.89060
81.00000																135.65980
81.50000																131.14610
82.00000																130.32910
82.50000																126.09220
83.00000																123.07250
83.50000																120.27070
84.00000																119.08010
84.50000																119.01980
85.00000																119.98420
85.50000																118.94180
86.00000																118.50530
86.50000																118.56120
87.00000																118.41140
87.50000																118.25540
88.00000																116.96460
88.50000																113.89000
89.00000																112.93210
89.50000																110.83240
90.00000																107.03000
90.50000																107.05020
91.00000																105.68810
91.50000																104.62360
92.00000																106.50870
92.50000																106.17540
93.00000																106.67330
93.50000																105.97480
94.00000																98.84963
94.50000																90.11077
95.00000																83.37560
95.50000																78.27902
96.00000																75.73046
96.50000																69.71439
97.00000																63.04786
97.50000																57.44662
98.00000																55.21279
98.50000																46.06722
99.00000																35.85059
99.50000																26.65039
100.00000																20.58778
100.50000																15.99700
101.00000																12.10288
101.50000																17.44641
85.50000																	154.62810
86.00000																	152.91480
86.50000																	150.83370
87.00000																	151.65370
87.50000																	150.49440
88.00000																	150.50830
88.50000																	147.93000
89.00000																	146.16200
89.50000																	141.29080
90.00000																	138.85890
90.50000																	137.50040
91.00000																	135.46760
91.50000																	133.21640
92.00000																	126.71660
92.50000																	121.57180
93.00000																	118.69980
93.50000																	117.33010
94.00000																	111.65370
94.50000																	108.68720
95.00000																	105.30560
95.50000																	106.47490
96.00000																	102.67840
96.50000																	97.18683
97.00000																	90.91598
97.50000																	87.31991
98.00000																	82.06630
98.50000																	75.31476
99.00000																	67.87440
99.50000																	61.30341
100.00000																	48.08972
100.50000																	40.34294
101.00000																	31.47618
30.50000																			125.0754
31.00000																			125.6344
31.50000																			123.6958
32.00000																			125.2874
32.50000																			124.6941
33.00000																			123.6625
33.50000																			123.9632
34.00000																			124.5683
34.50000																			124.9389
35.00000																			124.4124
35.50000																			122.4741
36.00000																			125.1182
36.50000																			123.5593
37.00000																			122.8448
37.50000																			124.2242
38.00000																			124.4188
38.50000																			125.4803
39.00000																			125.0093
39.50000																			122.3913
40.00000																			125.8569
40.50000																			122.0317
41.00000																			124.9112
41.50000																			121.9745
42.00000																			121.1678
42.50000																			124.1344
43.00000																			122.3130
43.50000																			123.9069
44.00000																			121.0331
44.50000																			122.2854
45.00000																			122.2907
45.50000																			123.8173
46.00000																			121.2651
46.50000																			122.7596
47.00000																			119.2965
47.50000																			122.9027
48.00000																			118.8912
48.50000																			120.1438
49.00000																			118.7077
49.50000																			121.0769
50.00000																			119.5472
50.50000																			120.1752
51.00000																			120.3057
51.50000																			119.5054
52.00000																			120.0741
52.50000																			122.3591
53.00000																			118.2213
53.50000																			122.4282
54.00000																			120.0127
54.50000																			120.1105
55.00000																			121.5786
55.50000																			118.9697
56.00000																			122.9524
56.50000																			119.1027
57.00000																			120.9737
57.50000																			118.2472
58.00000																			123.4159
58.50000																			118.7647
59.00000																			121.7235
59.50000																			120.9250
60.00000																			121.6987
60.50000																			122.4932
61.00000																			119.7422
61.50000																			122.1357
62.00000																			121.1935
62.50000																			121.5277
63.00000																			120.5647
63.50000																			122.3029
64.00000																			119.1781
64.50000																			121.8087
65.00000																			121.2448
65.50000																			120.8169
66.00000																			120.8702
66.50000																			121.9722
67.00000																			122.0484
67.50000																			121.2342
68.00000																			122.2016
68.50000																			122.2358
69.00000																			123.2615
69.50000																			122.6269
70.00000																			122.8438
70.50000																			122.8886
71.00000																			122.1240
71.50000																			123.1815
72.00000																			122.1372
72.50000																			122.1367
73.00000																			122.1863
73.50000																			122.0792
74.00000																			122.8387
74.50000																			122.2906
75.00000																			122.8116
75.50000																			122.8287
76.00000																			123.4500
76.50000																			123.4405
77.00000																			123.5617
77.50000																			123.8700
78.00000																			124.3208
78.50000																			124.3984
79.00000																			124.6503
79.50000																			124.4562
80.00000																			124.8282
80.50000																			125.2062
81.00000																			125.8805
81.50000																			125.8702
82.00000																			126.4804
82.50000																			127.3746
83.00000																			127.7862
83.50000																			128.0706
84.00000																			127.2781
84.50000																			127.4709
85.00000																			127.1324
85.50000																			126.1511
86.00000																			125.3740
86.50000																			125.1606
87.00000																			125.0753
87.50000																			125.0801
88.00000																			124.5517
88.50000																			125.2894
89.00000																			127.3005
89.50000																			127.5090
90.00000																			127.8147
90.50000																			127.9775
91.00000																			127.5113
91.50000																			127.4398
92.00000																			127.4738
92.50000																			127.6657
93.00000																			128.0268
93.50000																			127.7748
94.00000																			127.6968
94.50000																			127.8010
95.00000																			128.1554
95.50000																			127.7455
110.00000																				146.7119
110.50000																				146.0164
111.00000																				140.5544
111.50000																				138.4759
112.00000																				137.4845
112.50000																				136.8079
113.00000																				135.4934
113.50000																				134.0249
114.00000																				132.9747
114.50000																				126.8475
115.00000																				121.1124
115.50000																				119.7427
116.00000																				120.2150
116.50000																				122.0974
117.00000																				124.1161
117.50000																				120.1789
118.00000																				121.9164
118.50000																				124.7503
119.00000																				128.1862
119.50000																				129.6412
120.00000																				129.3131
120.50000																				132.0327
121.00000																				132.4098
121.50000																				132.6690
122.00000																				128.9161
122.50000																				123.4963
123.00000																				120.5218
123.50000																				117.5956
124.00000																				111.3053
124.50000																				107.2071
125.00000																				106.3023
125.50000																				107.0121
65.00000																					254.59420
65.33333																					255.05210
65.66667																					252.73630
66.00000																					249.21860
66.33333																					248.95210
66.66667																					248.54040
67.00000																					247.38950
67.33333																					246.02870
67.66667																					239.51950
68.00000																					237.00390
68.33333																					235.03140
68.66667																					234.05810
69.00000																					234.15870
69.33333																					234.16820
69.66667																					232.12130
70.00000																					231.58710
70.33333																					231.19660
70.66667																					229.09540
71.00000																					226.79830
71.33333																					222.32470
71.66667																					221.09960
72.00000																					216.14920
72.33333																					211.57860
72.66667																					207.62700
73.00000																					205.72080
73.33333																					201.07770
73.66667																					198.91770
74.00000																					195.97070
74.33333																					189.96050
74.66667																					183.98280
75.00000																					181.03150
75.33333																					179.20170
75.66667																					179.99000
76.00000																					181.89150
76.33333																					183.29260
76.66667																					182.41240
77.00000																					180.77170
77.33333																					173.67100
77.66667																					169.47220
78.00000																					168.05700
78.33333																					169.19160
78.66667																					171.42390
79.00000																					171.56920
79.33333																					170.36610
79.66667																					169.79130
80.00000																					163.22310
80.33333																					159.44780
80.66667																					149.74640
81.00000																					145.54510
81.33333																					142.20780
81.66667																					133.01410
82.00000																					126.19990
82.33333																					121.00530
82.66667																					113.04490
83.00000																					114.45210
83.33333																					121.17470
83.66667																					121.41140
84.00000																					115.55460
84.33333																					108.35080
84.66667																					105.80950
85.00000																					105.06240
85.33333																					105.59900
85.66667																					111.07250
86.00000																					113.42860
86.33333																					111.61090
86.66667																					109.14460
87.00000																					100.37810
87.33333																					90.44044
87.66667																					83.71143
88.00000																					76.88414
88.33333																					69.92040
88.66667																					68.92250
89.00000																					62.14693
89.33333																					54.89200
89.66667																					48.13556
90.00000																					49.23469
90.33333																					46.81715
90.66667																					41.20878
91.00000																					29.20800
63.66667																						266.667700
64.00000																						263.195600
64.33333																						259.989000
64.66667																						257.053200
65.00000																						254.979600
65.33333																						255.301500
65.66667																						253.436800
66.00000																						249.556900
66.33333																						248.992900
66.66667																						248.428000
67.00000																						247.865500
67.33333																						245.653000
67.66667																						240.527900
68.00000																						237.559300
68.33333																						235.829400
68.66667																						234.811500
69.00000																						234.669800
69.33333																						234.774500
30.33333																							213.347900
30.66667																							213.189200
31.00000																							213.313100
31.33333																							213.258700
31.66667																							213.036600
32.00000																							212.971000
32.33333																							212.767500
32.66667																							212.133300
33.00000																							211.394700
33.33333																							212.125400
33.66667																							212.118900
34.00000																							212.157500
34.33333																							211.905600
34.66667																							211.641100
35.00000																							211.313800
35.33333																							211.041300
35.66667																							210.827200
36.00000																							211.054300
36.33333																							211.009600
36.66667																							210.666700
37.00000																							210.825700
37.33333																							210.219600
37.66667																							209.142400
38.00000																							207.597500
38.33333																							205.903200
38.66667																							195.130700
39.00000																							192.194900
39.33333																							190.766300
39.66667																							189.069800
40.00000																							188.227100
40.33333																							181.128100
40.66667																							180.291500
41.00000																							179.638200
41.33333																							172.424300
41.66667																							165.229800
42.00000																							160.161100
42.33333																							158.905000
42.66667																							158.011700
43.00000																							157.732000
43.33333																							156.687700
43.66667																							154.729300
44.00000																							155.519800
44.33333																							154.367400
44.66667																							154.585300
45.00000																							151.597900
45.33333																							147.835100
45.66667																							146.977800
46.00000																							145.167300
46.33333																							146.429100
46.66667																							145.200500
47.00000																							145.577800
47.33333																							144.994100
47.66667																							143.204300
48.00000																							142.451900
48.33333																							138.685700
48.66667																							134.450700
49.00000																							134.038500
49.33333																							136.360000
49.66667																							142.002800
50.00000																							145.121700
50.33333																							151.232200
50.66667																							149.814100
51.00000																							156.051500
51.33333																							161.428000
51.66667																							160.830500
52.00000																							164.165700
52.33333																							166.221400
52.66667																							167.664800
53.00000																							170.474500
53.33333																							171.790300
53.66667																							172.828000
54.00000																							173.437700
54.33333																							171.942900
54.66667																							170.836900
55.00000																							169.654600
55.33333																							164.817300
55.66667																							162.145200
56.00000																							157.921400
56.33333																							153.038800
56.66667																							146.351100
57.00000																							142.682600
57.33333																							139.492500
57.66667																							134.956000
58.00000																							135.638400
58.33333																							127.333900
58.66667																							123.345200
59.00000																							118.945800
59.33333																							120.948400
59.66667																							120.292700
60.00000																							121.234500
60.33333																							121.795200
60.66667																							119.526600
61.00000																							112.377400
61.33333																							105.419300
61.66667																							99.717650
62.00000																							90.983170
62.33333																							86.724990
62.66667																							78.025230
63.00000																							77.917490
63.33333																							78.012030
63.66667																							72.065130
64.00000																							71.018320
64.33333																							69.675420
64.66667																							68.240770
65.00000																							67.433200
65.33333																							63.780300
65.66667																							62.777410
66.00000																							58.226930
66.33333																							55.861820
66.66667																							53.382220
67.00000																							55.005140
67.33333																							56.938570
67.66667																							59.305150
68.00000																							58.951560
68.33333																							58.378130
68.66667																							57.567170
69.00000																							56.855450
69.33333																							54.434460
69.66667																							52.728580
70.00000																							48.937530
70.33333																							46.138480
70.66667																							50.265190
71.00000																							55.111360
71.33333																							54.844570
71.66667																							59.409250
72.00000																							59.487910
72.33333																							58.197340
72.66667																							58.404250
73.00000																							58.816180
73.33333																							61.815760
73.66667																							63.550680
74.00000																							65.175990
74.33333																							66.084720
74.66667																							67.744480
75.00000																							69.305660
75.33333																							69.573010
75.66667																							69.988470
76.00000																							70.117390
76.33333																							75.423660
76.66667																							70.744180
77.00000																							64.391370
77.33333																							62.705660
77.66667																							61.917310
78.00000																							63.098970
78.33333																							65.054860
78.66667																							66.243230
79.00000																							67.653340
79.33333																							65.981340
79.66667																							64.855790
80.00000																							67.285070
80.33333																							68.203410
80.66667																							68.257290
81.00000																							70.811050
81.33333																							69.669890
81.66667																							66.999260
82.00000																							64.667400
82.33333																							64.047630
82.66667																							63.549510
83.00000																							57.539850
83.33333																							56.749620
83.66667																							56.834100
84.00000																							58.596220
84.33333																							59.248260
84.66667																							60.876330
85.00000																							62.838060
85.33333																							61.743210
85.66667																							54.394160
86.00000																							48.826550
86.33333																							47.461150
86.66667																							44.805440
87.00000																							41.551020
87.33333																							37.627660
87.66667																							34.945860
88.00000																							33.125650
88.33333																							31.622730
88.66667																							21.742770
89.00000																							23.725080
89.33333																							23.090930
89.66667																							20.901080
90.00000																							11.394580
90.33333																							7.582530
90.66667																							6.311925
91.00000																							5.190356
71.33333																								210.800200
71.66667																								209.093300
72.00000																								208.669000
72.33333																								204.654000
72.66667																								201.987200
73.00000																								202.006500
73.33333																								197.663900
73.66667																								195.553900
74.00000																								194.007600
74.33333																								188.138800
74.66667																								186.224500
75.00000																								181.721200
75.33333																								174.631400
75.66667																								173.446200
76.00000																								170.419600
76.33333																								165.773700
76.66667																								160.891900
77.00000																								161.388800
77.33333																								159.490600
77.66667																								158.175000
78.00000																								157.936900
78.33333																								157.304800
78.66667																								153.490600
79.00000																								149.822700
79.33333																								149.532700
79.66667																								149.245100
80.00000																								148.957200
80.33333																								148.002400
80.66667																								141.507900
81.00000																								135.036600
81.33333																								132.340600
81.66667																								128.877800
82.00000																								128.304700
82.33333																								124.925000
82.66667																								119.227700
83.00000																								119.064700
83.33333																								118.675800
80.66667																								133.921900
81.00000																								134.872400
81.33333																								132.656800
81.66667																								129.140900
82.00000																								128.498600
82.33333																								125.131900
82.66667																								120.188100
83.00000																								119.384300
83.33333																								119.039600
83.66667																								118.595400
84.00000																								113.855700
84.33333																								110.368000
84.66667																								105.625400
85.00000																								98.493890
85.33333																								98.702370
85.66667																								96.376690
86.00000																								97.862210
86.33333																								96.959660
86.66667																								96.283980
87.00000																								96.469040
87.33333																								93.551490
87.66667																								90.568570
88.00000																								87.303340
88.33333																								85.950190
88.66667																								84.199680
89.00000																								84.725770
89.33333																								83.913850
89.66667																								82.530900
90.00000																								82.001810
90.33333																								82.030470
90.66667																								82.025210
91.00000																								82.259080
91.33333																								81.870330
91.66667																								80.532790
92.00000																								80.097220
92.33333																								77.628040
92.66667																								75.813060
93.00000																								75.910950
93.33333																								73.764270
93.66667																								70.421830
94.00000																								70.432240
94.33333																								70.065340
94.66667																								70.059930
95.00000																								67.405220
95.33333																								65.183660
95.66667																								63.755540
96.00000																								62.805440
96.33333																								60.666620
96.66667																								60.089070
97.00000																								64.434440
97.33333																								65.974720
97.66667																								61.877630
98.00000																								62.997020
98.33333																								64.881090
98.66667																								65.528010
99.00000																								63.723960
99.33333																								62.317010
99.66667																								55.432610
100.00000																								59.050070
100.33330																								62.670310
100.66670																								65.818930
101.00000																								66.300500
101.33330																								67.060630
42.00000																									33.215930
42.50000																									33.690820
43.00000																									34.621450
43.50000																									35.635400
44.00000																									36.724680
44.50000																									39.632510
45.00000																									41.509870
45.50000																									42.237770
46.00000																									42.994190
46.50000																									43.256290
47.00000																									45.255570
47.50000																									48.562050
48.00000																									49.288550
48.50000																									49.796780
49.00000																									49.527140
49.50000																									50.067990
50.00000																									53.604920
50.50000																									51.082640
51.00000																									50.627190
51.50000																									50.507700
52.00000																									50.883420
52.50000																									54.647060
53.00000																									54.737490
53.50000																									53.284040
54.00000																									50.822630
54.50000																									50.864200
55.00000																									52.347810
55.50000																									54.892480
56.00000																									54.540200
56.50000																									54.816030
57.00000																									55.469290
57.50000																									55.342970
58.00000																									55.495640
58.50000																									54.881400
59.00000																									55.136330
59.50000																									54.936850
60.00000																									52.777320
60.50000																									50.845970
61.00000																									51.220170
61.50000																									51.883920
62.00000																									50.262350
62.50000																									51.401970
63.00000																									49.579480
63.50000																									48.627110
64.00000																									48.480480
64.50000																									51.074110
65.00000																									49.828420
65.50000																									48.417330
66.00000																									48.091870
66.50000																									47.313650
67.00000																									46.871290
67.50000																									46.963050
68.00000																									47.347590
68.50000																									47.558700
69.00000																									47.692620
69.50000																									47.222430
70.00000																									45.676590
70.50000																									44.520280
71.00000																									43.475580
71.50000																									43.377080
72.00000																									41.227670
72.50000																									39.806840
73.00000																									38.494390
73.50000																									37.618070
74.00000																									33.256340
74.50000																									28.908350
75.00000																									24.572120
75.50000																									24.197870
76.00000																									23.911080
76.50000																									24.583570
77.00000																									22.123800
77.50000																									18.030700
78.00000																									17.282900
78.50000																									11.137300
79.00000																									11.414650
79.50000																									10.648890
80.00000																									11.607900
80.50000																									11.704370
81.00000																									12.005370
81.50000																									12.429870
82.00000																									12.621900
82.50000																									11.552890
83.00000																									9.437276
83.50000																									9.137724
84.00000																									10.409850
84.50000																									10.031840
59.00000																										93.47267
59.50000																										91.57009
60.00000																										89.66890
60.50000																										89.75371
61.00000																										87.62636
61.50000																										86.67190
62.00000																										85.74834
62.50000																										83.68863
63.00000																										82.05976
63.50000																										80.74599
64.00000																										79.12221
64.50000																										77.39167
65.00000																										74.57765
65.50000																										71.80896
66.00000																										69.84173
66.50000																										69.89701
67.00000																										69.48837
67.50000																										65.06419
68.00000																										59.07382
68.50000																										53.24829
69.00000																										46.94510
69.50000																										44.14475
70.00000																										42.13642
70.50000																										39.06944
71.00000																										32.28074
71.50000																										27.91868
72.00000																										26.50590
72.50000																										25.31120
73.00000																										24.41374
73.50000																										22.96128
74.00000																										18.07124
74.50000																										16.91132
75.00000																										12.18439
75.50000																										12.19755
76.00000																										13.43193
76.50000																										13.23115
77.00000																										12.71316
77.50000																										12.54831
78.00000																										12.54562
78.50000																										12.67517
79.00000																										13.06973
79.50000																										12.91054
80.00000																										12.67569
80.50000																										12.53702
81.00000																										12.99767
81.50000																										13.29140
82.00000																										13.25480
82.50000																										13.51480
83.00000																										12.84334
83.50000																										12.83229
84.00000																										12.88357
84.50000																										13.08336
85.00000																										13.11164
85.50000																										12.98617
86.00000																										12.85954
86.50000																										12.38856
87.00000																										12.05395
87.50000																										12.11131
88.00000																										12.72486
88.50000																										12.84623
89.00000																										12.57843
89.50000																										12.32770
90.00000																										12.04464
90.50000																										12.33607
91.00000																										12.20540
91.50000																										12.14788
92.00000																										12.10094
92.50000																										11.91461
93.00000																										12.20242
93.50000																										12.90166
94.00000																										13.40523
94.50000																										12.45978
95.00000																										12.36646
95.50000																										12.42229
96.00000																										12.57800
96.50000																										12.73735
97.00000																										12.79447
97.50000																										12.66295
98.00000																										12.91017
98.50000																										12.91542
99.00000																										12.76212
99.50000																										12.73373
100.00000																										12.62429
100.50000																										12.76738
101.00000																										13.18385
101.50000																										13.58942
102.00000																										13.16608
102.50000																										12.95380
103.00000																										12.74246
103.50000																										12.53187
104.00000																										12.79473
104.50000																										11.80684
105.00000																										12.15328
105.50000																										12.14178
106.00000																										12.21981
106.50000																										12.30151
107.00000																										11.79063
107.50000																										12.11513
108.00000																										12.01746
108.50000																										12.25785
109.00000																										12.54181
109.50000																										12.82586
110.00000																										11.82366
110.50000																										12.63524
60.50000																											131.52880
61.00000																											131.25720
61.50000																											128.83520
62.00000																											125.84930
62.50000																											124.46400
63.00000																											123.36320
63.50000																											122.95810
64.00000																											122.06320
64.50000																											124.05130
65.00000																											127.56830
65.50000																											128.42920
66.00000																											128.99810
66.50000																											128.90560
67.00000																											129.48420
67.50000																											129.55060
68.00000																											129.97830
68.50000																											130.11730
69.00000																											129.43070
69.50000																											127.70460
70.00000																											125.74690
70.50000																											126.05610
71.00000																											125.01670
71.50000																											122.63950
72.00000																											120.49980
72.50000																											117.61050
73.00000																											115.65450
73.50000																											110.77180
74.00000																											109.12500
74.50000																											106.05690
75.00000																											103.88620
75.50000																											101.75520
76.00000																											100.77010
76.50000																											100.64790
77.00000																											100.56230
77.50000																											99.51449
78.00000																											97.29386
78.50000																											93.90724
79.00000																											91.56802
79.50000																											91.70868
80.00000																											92.05219
80.50000																											90.99736
81.00000																											91.02393
81.50000																											89.06099
82.00000																											87.28430
82.50000																											86.91291
83.00000																											85.16344
83.50000																											81.13133
84.00000																											78.21732
84.50000																											76.17848
85.00000																											75.98423
85.50000																											77.04211
86.00000																											77.00371
86.50000																											77.61791
87.00000																											77.67418
87.50000																											73.86327
88.00000																											72.31574
88.50000																											70.27557
89.00000																											67.87773
89.50000																											63.71910
90.00000																											60.18131
90.50000																											55.36427
91.00000																											52.35699
91.50000																											49.60125
92.00000																											49.15641
92.50000																											49.67013
93.00000																											49.77375
93.50000																											50.04788
94.00000																											49.65875
94.50000																											48.98325
95.00000																											43.00060
95.50000																											42.08750
96.00000																											41.96912
96.50000																											41.86302
97.00000																											41.76937
97.50000																											41.38497
98.00000																											42.15648
98.50000																											43.20765
99.00000																											41.49282
99.50000																											37.75640
100.00000																											39.29149
100.50000																											39.18540
101.00000																											35.32724
101.50000																											29.09600
102.00000																											25.68466
102.50000																											24.13580
103.00000																											21.59041
103.50000																											19.90247
104.00000																											20.04572
104.50000																											23.37659
105.00000																											25.61680
105.50000																											27.83775
106.00000																											31.98682
106.50000																											33.29943
107.00000																											35.43416
107.50000																											38.19260
108.00000																											43.02607
108.50000																											41.09791
109.00000																											37.99369
109.50000																											32.24505
110.00000																											24.56081
110.50000																											21.49464
87.50000																												32.38546
88.00000																												32.10046
88.50000																												30.40705
89.00000																												29.36691
89.50000																												28.13280
90.00000																												24.33927
90.50000																												22.51301
91.00000																												20.18045
91.50000																												20.05359
92.00000																												18.80599
92.50000																												19.41684
93.00000																												18.94790
93.50000																												21.59306
94.00000																												24.39355
94.50000																												21.94453
95.00000																												21.91825
95.50000																												22.86834
96.00000																												24.30028
96.50000																												25.34292
97.00000																												26.33621
97.50000																												27.51890
98.00000																												28.70944
87.50000																													35.76434
88.00000																													36.54908
88.50000																													36.27497
89.00000																													32.73557
89.50000																													27.10361
90.00000																													21.47053
90.50000																													15.86578
91.00000																													13.32215
91.50000																													13.03342
92.00000																													12.95483
92.50000																													11.23626
93.00000																													12.78575
93.50000																													13.41782
94.00000																													13.50853
94.50000																													13.80121
95.00000																													14.00083
95.50000																													13.83200
96.00000																													12.68216
96.50000																													12.08319
97.00000																													13.92885
97.50000																													14.34971
98.00000																													14.51095
98.50000																													15.68146
99.00000																													15.82996
99.50000																													15.59761
100.00000																													15.36883
100.50000																													14.22491
101.00000																													12.95141
101.50000																													11.82689
102.00000																													12.11355
102.50000																													12.87607
50.50000																														250.67090
51.00000																														251.26070
51.50000																														251.77340
52.00000																														252.04440
52.50000																														251.96620
53.00000																														252.21700
53.50000																														252.82380
54.00000																														252.00040
54.50000																														251.12540
55.00000																														250.15380
55.50000																														249.82240
56.00000																														247.81010
56.50000																														245.41790
57.00000																														243.08340
[truncated: 236 more rows]
[truncated: 2 more columns]
