# Supplementary material for: Pioneer neutrophils release chromatin within in vivo swarms
Source: eLife. 2021 Jul 21;10:e68755. doi: 10.7554/eLife.68755 (PMC8298094; doi:10.7554/eLife.68755)
Supplement: Figure 2—source data 3. [file elife-68755-fig2-data3.csv]

Pioneer neutrophils	Wound neutrophils
0.779000	90.530000
4.740000	9.070000
6.080000	145.100000
7.410000	85.570000
10.440000	73.160000
	13.090000
	74.110000
	12.560000
	67.690000
	36.280000
	7.520000
	28.180000
	44.180000
	29.610000
	28.300000
	27.590000
