# Supplementary material for: Pioneer neutrophils release chromatin within in vivo swarms
Source: eLife. 2021 Jul 21;10:e68755. doi: 10.7554/eLife.68755 (PMC8298094; doi:10.7554/eLife.68755)
Supplement: Figure 2—source data 6. [file elife-68755-fig2-data6.csv]

	Pioneer neutrophils	Pioneer neutrophils	Pioneer neutrophils	Pioneer neutrophils	Pioneer neutrophils	Pioneer neutrophils	Pioneer neutrophils	Pioneer neutrophils	Pioneer neutrophils	Pioneer neutrophils	Pioneer neutrophils	Pioneer neutrophils	Pioneer neutrophils	Pioneer neutrophils	Pioneer neutrophils	Pioneer neutrophils	Pioneer neutrophils	Pioneer neutrophils	Pioneer neutrophils	Pioneer neutrophils	Non-pioneer neutrophils	Non-pioneer neutrophils	Non-pioneer neutrophils	Non-pioneer neutrophils	Non-pioneer neutrophils	Non-pioneer neutrophils	Non-pioneer neutrophils	Non-pioneer neutrophils	Non-pioneer neutrophils	Non-pioneer neutrophils	Non-pioneer neutrophils	Non-pioneer neutrophils	Non-pioneer neutrophils	Non-pioneer neutrophils	Non-pioneer neutrophils	Non-pioneer neutrophils	Non-pioneer neutrophils	Non-pioneer neutrophils	Non-pioneer neutrophils	Non-pioneer neutrophils
Scouting	0.900000	0.820000	0.530000	0.900000	0.860000																0.350000	0.860000	0.800000	0.380000	0.240000	0.220000	0.400000	0.540000			0.250000	0.300000	0.830000		0.920000	0.640000	0.860000	0.560000
Initiation	0.070000	0.120000	0.140000	0.880000	0.150000																0.350000			0.708000	0.450000	0.810000	0.260000	0.170000	0.840000	0.410000	0.100000	0.180000	0.130000	0.830000	0.950000		0.430000
