# Supplementary material for: Pioneer neutrophils release chromatin within in vivo swarms
Source: eLife. 2021 Jul 21;10:e68755. doi: 10.7554/eLife.68755 (PMC8298094; doi:10.7554/eLife.68755)
Supplement: Figure 3—source data 2. [file elife-68755-fig3-data2.csv]

Vehicle	zVAD-fmk (100μM)
8.3	4.3
13.0	8.3
25.0	25.6
28.8	8.9
15.6	23.1
