# Supplementary material for: Pioneer neutrophils release chromatin within in vivo swarms
Source: eLife. 2021 Jul 21;10:e68755. doi: 10.7554/eLife.68755 (PMC8298094; doi:10.7554/eLife.68755)
Supplement: Figure 4—source data 1. [file elife-68755-fig4-data1.csv]

Nearest neighbours	Debris	Cytoplasmic balloons
147.05	16.47	217.99
90.17	15.87	265.01
116.78	5.84	123.15
89.38	10.62	153.82
80.87	14.07	133.18
57.34	20.15	186.52
77.74	7.22
75.05	10.75
75.07	24.99
76.55	6.36
58.78	6.59
115.53
55.38
48.69
72.03
