# Supplementary material for: Pioneer neutrophils release chromatin within in vivo swarms
Source: eLife. 2021 Jul 21;10:e68755. doi: 10.7554/eLife.68755 (PMC8298094; doi:10.7554/eLife.68755)
Supplement: Figure 4—source data 2. [file elife-68755-fig4-data2.csv]

	Neutrophil	A	B
1	66.442
2	83.160
3	95.737
4	51.435	32.130	23.895
5	43.965	18.113	51.795
6	24.367	16.942	58.815
7	11.002	14.467	75.172
8	11.925	8.348	86.985
9	9.787	6.907	100.260
10	8.257	3.510	128.812
