# Supplementary material for: Pioneer neutrophils release chromatin within in vivo swarms
Source: eLife. 2021 Jul 21;10:e68755. doi: 10.7554/eLife.68755 (PMC8298094; doi:10.7554/eLife.68755)
Supplement: Figure 7—source data 2. [file elife-68755-fig7-data2.csv]

DMSO	MeOSU
38.46	16.00
28.57	17.86
35.71	10.71
