# Supplementary material for: Pioneer neutrophils release chromatin within in vivo swarms
Source: eLife. 2021 Jul 21;10:e68755. doi: 10.7554/eLife.68755 (PMC8298094; doi:10.7554/eLife.68755)
Supplement: Figure 7—source data 3. [file elife-68755-fig7-data3.csv]

tyr	mpx
24.40	9.60
53.00	20.00
19.40	4.50
