# Supplementary material for: Pioneer neutrophils release chromatin within in vivo swarms
Source: eLife journal article supplement (doi:10.7554/elife.68755), 2021-07-21
Supplement: transrepform [file elife-68755-transrepform-v1.pdf]

## eLife's transparent reporting form

We encourage authors to provide detailed information *within their submission* to facilitate the interpretation and replication of experiments. Authors can upload supporting documentation to indicate the use of appropriate reporting guidelines for health-related research (see [EQUATOR Network](#)), life science research (see the [BioSharing Information Resource](#)), or the [ARRIVE guidelines](#) for reporting work involving animal research. Where applicable, authors should refer to any relevant reporting standards documents in this form.

If you have any questions, please consult our Journal Policies and/or contact us: [editorial@elifesciences.org](mailto:editorial@elifesciences.org).

### Sample-size estimation

- You should state whether an appropriate sample size was computed when the study was being designed
- You should state the statistical method of sample size computation and any required assumptions
- If no explicit power analysis was used, you should describe how you decided what sample (replicate) size (number) to use

Please outline where this information can be found within the submission (e.g., sections or figure legends), or explain why this information doesn't apply to your submission:

Due to this paper detailing the development of a new zebrafish model to investigate swarming, no explicit power analysis was used. Swarm formation is a stochastic event making power analyses difficult. For previously published methods sample sizes were based on publications cited in the Materials and Methods.

### Replicates

- You should report how often each experiment was performed
- You should include a definition of biological versus technical replication
- The data obtained should be provided and sufficient information should be provided to indicate the number of independent biological and/or technical replicates
- If you encountered any outliers, you should describe how these were handled
- Criteria for exclusion/inclusion of data should be clearly stated
- High-throughput sequence data should be uploaded before submission, with a private link for reviewers provided (these are available from both GEO and ArrayExpress)

Please outline where this information can be found within the submission (e.g., sections or figure legends), or explain why this information doesn't apply to your submission:

Information about replicates and n numbers are outlined in corresponding figure legends. No outliers were excluded from analyses. For some experiments (eg caspase inhibition experiments) larvae that failed to produce an inflammatory response (occasionally happens due to variation in immune response, as different larvae produce different responses much like humans can exhibit different immune responses to the same stimuli) to the tailfin transection were excluded as an inflammatory response was required for the assay. This is detailed in the corresponding Materials and Methods section. We have included links to the publicly available sequencing data used in this manuscript in the data availability section of the manuscript.

## Statistical reporting

- Statistical analysis methods should be described and justified
- Raw data should be presented in figures whenever informative to do so (typically when N per group is less than 10)
- For each experiment, you should identify the statistical tests used, exact values of N, definitions of center, methods of multiple test correction, and dispersion and precision measures (e.g., mean, median, SD, SEM, confidence intervals; and, for the major substantive results, a measure of effect size (e.g., Pearson's r, Cohen's d)
- Report exact p-values wherever possible alongside the summary statistics and 95% confidence intervals. These should be reported for all key questions and not only when the p-value is less than 0.05.

Please outline where this information can be found within the submission (e.g., sections or figure legends), or explain why this information doesn't apply to your submission:

Details of the statistical analyses used are detailed in the Statistical Analysis section of the Materials and Methods. Where possible we have used scatterplots to show all appropriate raw data. N numbers and statistical tests used are detailed in the appropriate figure legends for scatter plots.

(For large

datasets, or papers with a very large number of statistical tests, you may upload a single table file with tests, Ns, etc., with reference to sections in the manuscript.)

## Group allocation

- Indicate how samples were allocated into experimental groups (in the case of clinical studies, please specify allocation to treatment method); if randomization was used, please also state if restricted randomization was applied
- Indicate if masking was used during group allocation, data collection and/or data analysis

Please outline where this information can be found within the submission (e.g., sections or figure legends), or explain why this information doesn't apply to your submission:

In treatment studies larvae from the same batch of larvae were randomly allocated into groups before treatments (with suitable negative control). Treatment groups were blinded to the experimenter until post analysis. This is stated in the relevant Materials and Methods section.

## Additional data files ("source data")

- We encourage you to upload relevant additional data files, such as numerical data that are represented as a graph in a figure, or as a summary table
- Where provided, these should be in the most useful format, and they can be uploaded as "Source data" files linked to a main figure or table
- Include model definition files including the full list of parameters used
- Include code used for data analysis (e.g., R, MatLab)
- Avoid stating that data files are "available upon request"

Please indicate the figures or tables for which source data files have been provided:

Numerical data from figures 1, 2, 3, 4, 6 7, have been uploaded as supplementary files (.csv file). This is stated in the data availability statement.
